# Supplementary material for: Three-dimensional subgridscale energy model of eastern bering sea
Source: Royal Society of Chemistry journal article supplement (doi:10.1039/d1ra06109g), 1978-01-01
Supplement: d1ra06109g1.pdf [file d1ra06109g1.pdf]

## Supporting Information

# Palladium-rich Plasmonic Nanorattles with Enhanced LSPRs *via* Successive Galvanic Replacement Mediated by Co-reduction

Mariia Ivanchenko<sup>a</sup>, Andrew J. Evangelista<sup>a</sup>, Hao Jing<sup>\*a</sup>

<sup>a</sup>Department of Chemistry and Biochemistry, George Mason University, Fairfax, Virginia 22030, USA

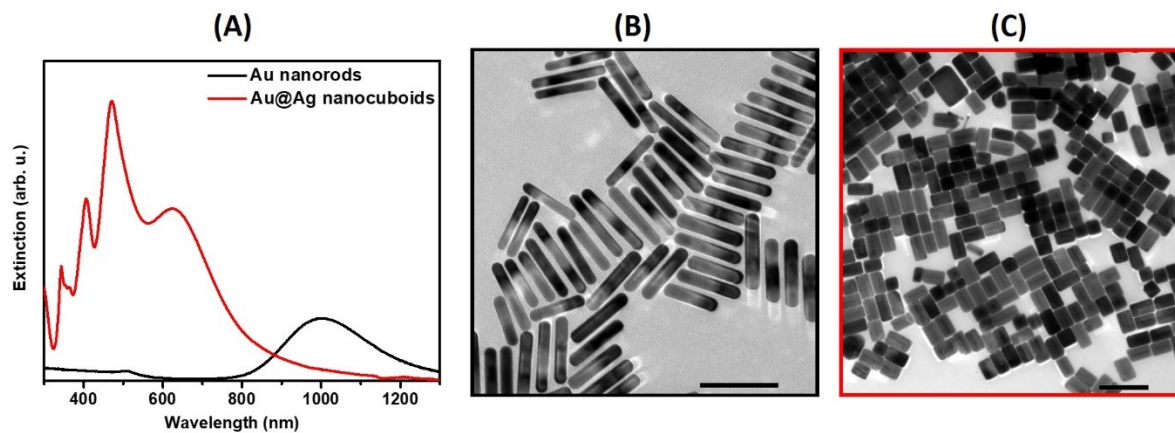

**Fig. S1.** (A) Extinction spectra of Au NRs and Au@Ag nanocuboids colloidal solutions. (B) TEM image of Au NRs. Scale bar corresponds to 100 nm. (C) TEM image of Au@Ag nanocuboids. Scale bar corresponds to 200 nm.

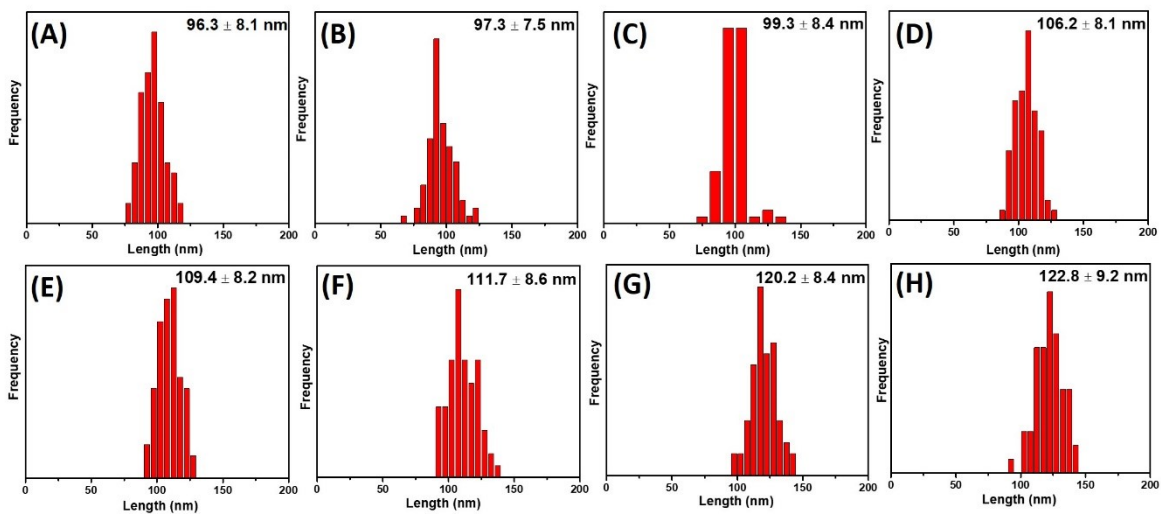

**Fig. S2.** Length distributions of (A) Au@Ag nanocuboids and (B-H) Au@Ag\_Pd nanorattles obtained using (B) 10  $\mu\text{L}$ , (C) 30  $\mu\text{L}$ , (D) 50  $\mu\text{L}$ , (E) 70  $\mu\text{L}$ , (F) 90  $\mu\text{L}$ , (G) 150  $\mu\text{L}$ , and (H) 200  $\mu\text{L}$  of 1 mM  $\text{H}_2\text{PdCl}_4$  obtained from analysis of TEM images.

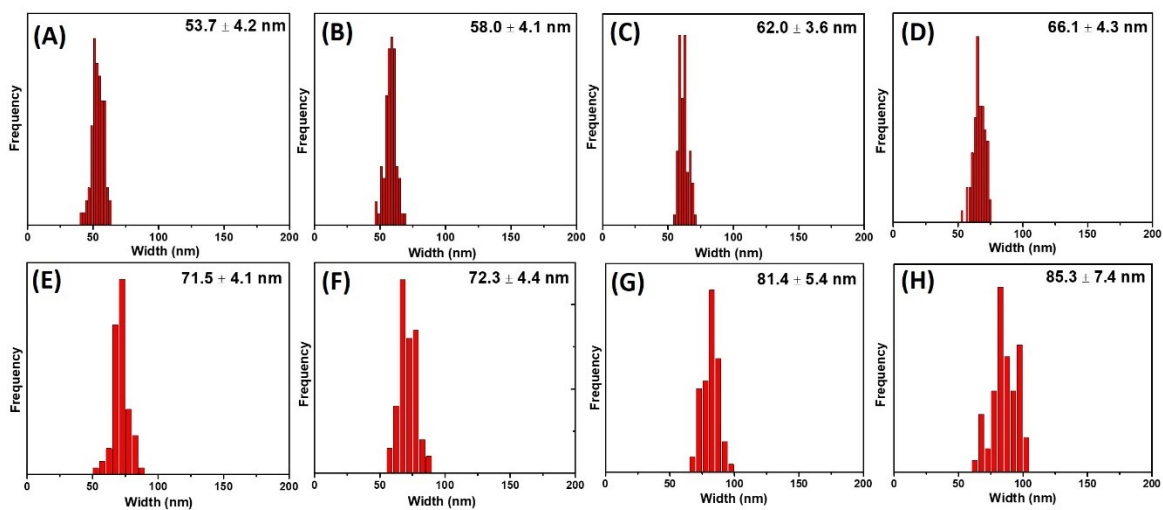

**Fig. S3.** Width distributions of (A) Au@Ag nanocuboids and (B-H) Au@Ag/Pd nanorattles obtained using (B) 10 μL, (C) 30 μL, (D) 50 μL, (E) 70 μL, (F) 90 μL, (G) 150 μL, and (H) 200 μL of 1 mM H<sub>2</sub>PdCl<sub>4</sub> obtained from analysis of TEM images.

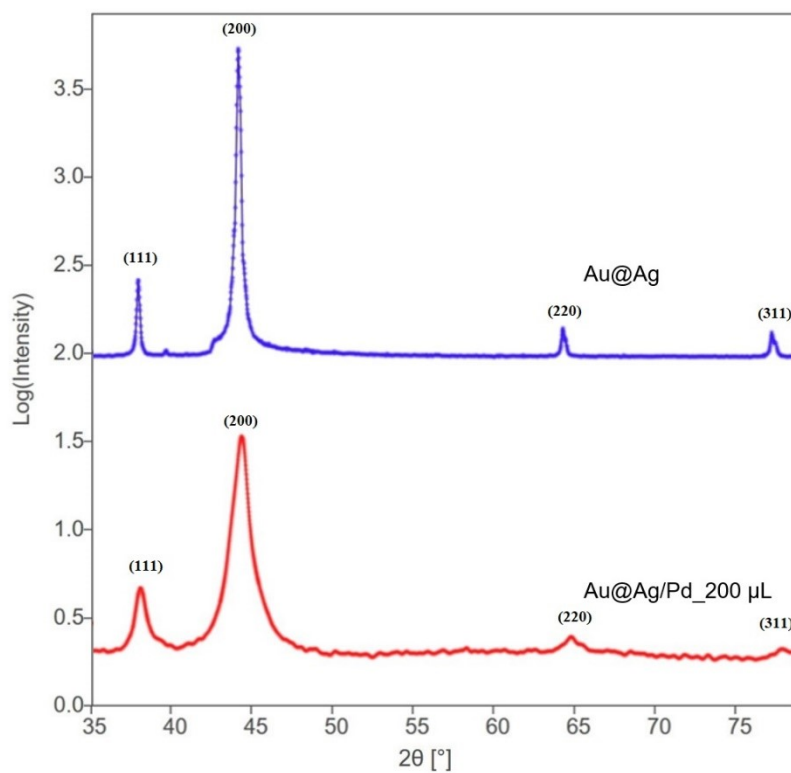

**Fig. S4.** XRD patterns of Au@Ag nanocuboids and Au@Ag/Pd nanorattles.

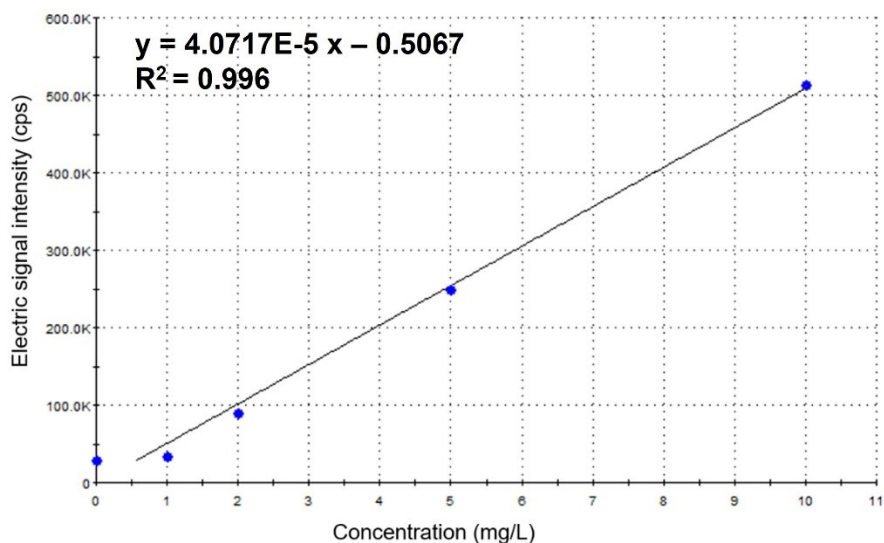

Fig. S5. Five-point calibration curve for ICP-OES measurements of Pd-content.

**Table S1.** The leaching study of Pd active sites in Au@Ag/Pd nanorattles obtained using 200  $\mu$ L of 1 mM  $H_2PdCl_4$  during 4-NTP to 4-ATP conversion based on ICP-OES results. (standard deviation is 0.40 mg/L)

| Sample          | Concentration of Pd in nanorattles |
|-----------------|------------------------------------|
| Before reaction | 21.64 mg/L                         |
| After reaction  | 19.51 mg/L                         |

**Table S2.** Comparison of the catalytic performance based on the kinetic constants ( $k$ ) of the multicomponent plasmonic nanomaterials (including Au, Ag and Pd) of various morphologies for the conversion of the 4-NTP to 4-ATP obtained from SERS monitoring.

| Nanostructure                  | $k$                           | Pd content        | Ref.      |
|--------------------------------|-------------------------------|-------------------|-----------|
| Au@Ag/Pd nanorattles           | $0.044\ s^{-1}$               | mole%(Pd) = 1.6%  | This work |
|                                | $0.069\ s^{-1}$               | mole%(Pd) = 8.0%  |           |
|                                | $0.088\ s^{-1}$               | mole%(Pd) = 13.6% |           |
|                                | $0.146\ s^{-1}$               | mole%(Pd) = 20.9% |           |
| AuAg:Pd concave nanolayers     | $5.5 \times 10^{-3}\ s^{-1}$  | mole%(Pd) = 4.8%  | 1         |
|                                | $1.0 \times 10^{-2}\ s^{-1}$  | mole%(Pd) = 9.6%  |           |
| Au@AgPd core/shell nanoflowers | $6.64 \times 10^{-3}\ s^{-1}$ | wt%(Pd) = 45.3%   | 2         |

## References

- 1 W. S. Huang, I W. Sun, C. C. Huang. *J. Mater. Chem. A*, 2018, **6**, 13041-13049.
- 2 Y. Lai, L. Dong, R. Liu, S. Lu, Z. He, W. Shan, F. Geng, Y. Cai, J. Liu. *Chin. Chem. Lett.*, 2020, **31**, 9, 2437-2441.
